# Supplementary material for: Intra-tumoral angiogenesis correlates with immune features and prognosis in glioma
Source: publisher site journal article supplement (doi:10.18632/aging.204079), 2022-05-17
Supplement: Supplementary file [file aging-v14i10-204079-supplementary-material-SD2.pdf]

## SUPPLEMENTARY TABLE

**Supplementary Table 1. Clinical and molecular characteristics of patients included in this study.**

| Cohort                           | TCGA<br>(n = 616)             | CGGA (mRNAseq_325)<br>(n = 309) | CGGA (array)<br>(n = 282)           | GSE16011<br>(n = 264)                                      |
|----------------------------------|-------------------------------|---------------------------------|-------------------------------------|------------------------------------------------------------|
| Database                         | TCGA                          | CGGA                            | CGGA                                | GEO                                                        |
| Platform                         | Illumina Hiseq<br>2000 RNAseq | Illumina Hiseq 2000<br>RNAseq   | AgilentWholeHuman<br>Genome (Array) | Affymetrix GeneChip<br>Human Genome U133<br>Plus 2.0 Array |
| Age(year)                        |                               |                                 |                                     |                                                            |
| Mean (range)                     | 47.4 (14–89)                  | 43.2 (8–79)                     | 42.5 (12–70)                        | 50.87 (14.38–81.18)                                        |
| Gender                           |                               |                                 |                                     |                                                            |
| Female                           | 259                           | 116                             | 117                                 | 87                                                         |
| Male                             | 357                           | 193                             | 165                                 | 177                                                        |
| WHO grade                        |                               |                                 |                                     |                                                            |
| II                               | 224                           | 98                              | 106                                 | 24                                                         |
| III                              | 243                           | 74                              | 53                                  | 85                                                         |
| IV                               | 149                           | 137                             | 123                                 | 155                                                        |
| TCGA subtype                     |                               |                                 |                                     |                                                            |
| Classical                        | 83                            | –                               | 23                                  | –                                                          |
| Mesenchymal                      | 89                            | –                               | 105                                 | –                                                          |
| Neural                           | 99                            | –                               | 74                                  | –                                                          |
| Proneural                        | 218                           | –                               | 80                                  | –                                                          |
| Unavailable                      | 127                           | 309                             | 0                                   | 264                                                        |
| IDH status                       |                               |                                 |                                     |                                                            |
| Mutant                           | 391                           | 166                             | 127                                 | 80                                                         |
| Wild-type                        | 220                           | 142                             | 154                                 | 132                                                        |
| Unavailable                      | 5                             | 1                               | 1                                   | 52                                                         |
| 1p/19q status                    |                               |                                 |                                     |                                                            |
| Codel                            | 156                           | 62                              | 16                                  | –                                                          |
| Non-codel                        | 455                           | 242                             | 73                                  | –                                                          |
| Unavailable                      | 5                             | 5                               | 193                                 | 264                                                        |
| MGMT promoter methylation status |                               |                                 |                                     |                                                            |
| Methylated                       | 441                           | 150                             | 95                                  | –                                                          |
| Unmethylated                     | 144                           | 141                             | 177                                 | –                                                          |
| Unavailable                      | 31                            | 18                              | 10                                  | 264                                                        |

Abbreviations: CGGA: Chinese Glioma Genome Atlas; TCGA: The Cancer Genome Atlas; WHO: World Health Organization; 1p19q Codel: 1p19q codeleted; 1p19qNon-codel: 1p19q non-codeleted.
